# Supplementary material for: Declared Reasons for Cessation Breastfeeding During the First Year of Life: Multidisciplinary Analysis Based on a Cohort Study in Northern Spain
Source: Preprints.org preprint supplement (doi:10.20944/preprints202107.0114.v1), 2021-07-05
Supplement: Supplementary file 1 [file supplementary]

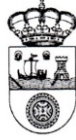

COMITÉ ÉTICO DE INVESTIGACIÓN  
CLÍNICA DE CANTABRIA  
IDIVAL

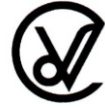

**T. CONCEPCION SOLANAS GUERRERO**, Secretario/a del **COMITÉ ÉTICO DE INVESTIGACIÓN CLÍNICA DE CANTABRIA**

CERTIFICA

Que este Comité ha evaluado la propuesta del Investigador Principal del estudio:

**TÍTULO: Retorno social de la inversión en lactancia materna en Cantabria. Impacto económico en la disminución de enfermedades infecciosas.**

**TIPO DE ESTUDIO: Proyecto de Investigación (Código interno: 2017.142)**

y considera que:

- Se cumplen los requisitos necesarios de idoneidad del protocolo en relación con los objetivos del estudio y están justificados los riesgos y molestias previsibles para el sujeto, teniendo en cuenta los beneficios esperados.
- Es adecuado el procedimiento para obtener el consentimiento informado.
- La capacidad del investigador y sus colaboradores, y las instalaciones y medios disponibles, tal y como ha sido informado, son apropiados para llevar a cabo el estudio.

Este CEIC, emite un informe **FAVORABLE** para que dicho Estudio sea realizado en el **HOSPITAL UNIVERSITARIO MARQUÉS DE VALDECILLA**, actuando como investigador principal Dña. **CAROLINA LECHOSA MUÑIZ**.

Como queda reflejado en el Acta: **12/2017**.

Lo que firmo en Santander, a **21 de julio de 2017**

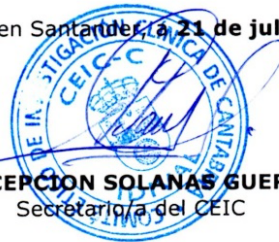

**T. CONCEPCION SOLANAS GUERRERO**  
Secretario/a del CEIC
